# Supplementary material
Source: PubMed Central journal article supplement (PMC9908494)
Supplement: ajtr0015-0373-f9.pdf [file ajtr0015-0373-f9.pdf]

## Metabolic signatures of OSCC

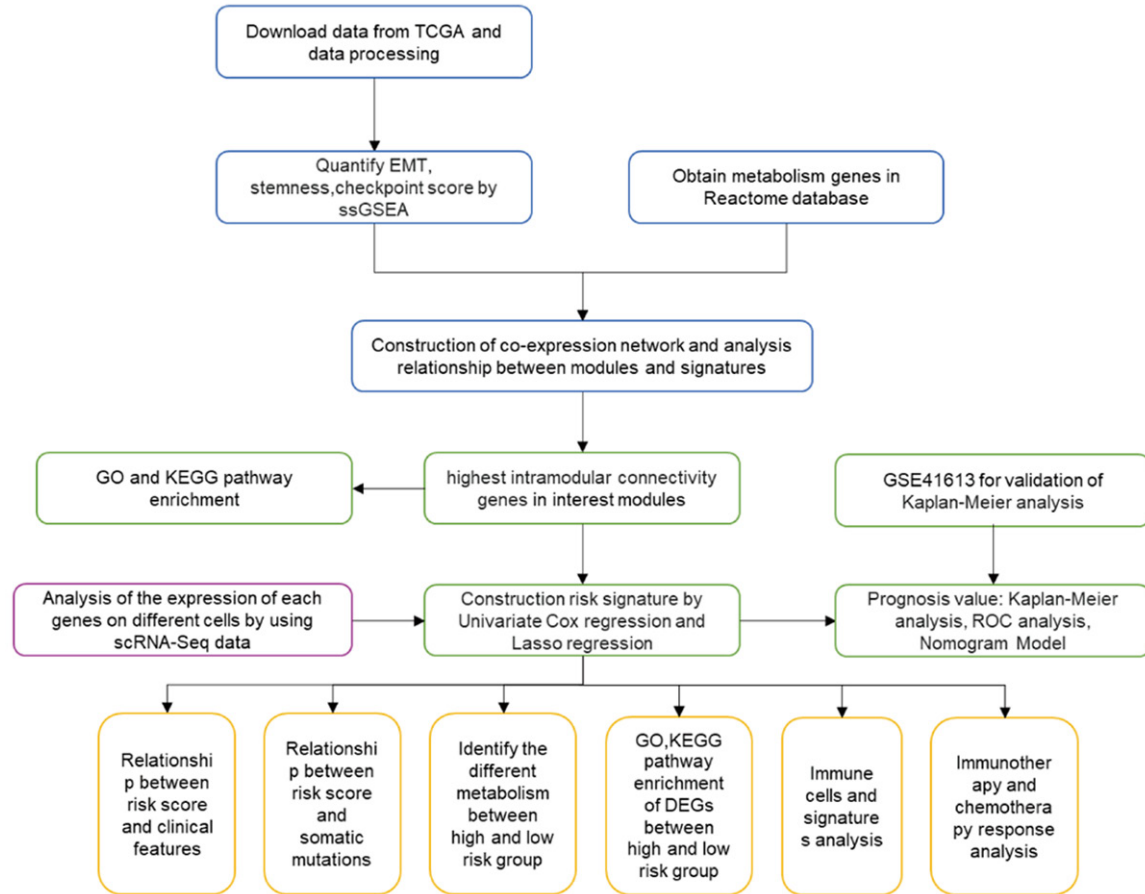

**Figure S1.** The flow chart of this study.

**Table S1.** 330 OSCC patients information in TCGA cohort

| Clinical characteristics |        | Number | n (%) |
|--------------------------|--------|--------|-------|
| Age                      | < 65   | 126    | 38.18 |
|                          | > 65   | 204    | 61.82 |
| Gender                   | male   | 229    | 69.39 |
|                          | female | 101    | 30.61 |
| T                        | TX-T1  | 26     | 7.88  |
|                          | T2     | 107    | 32.42 |
|                          | T3     | 83     | 25.15 |
|                          | T4     | 101    | 30.61 |
|                          | Null   | 13     | 3.94  |
| N                        | NX-NO  | 183    | 55.45 |
|                          | N1     | 56     | 16.97 |
|                          | N2     | 85     | 25.76 |
|                          | N3     | 6      | 1.82  |
| M                        | MX     | 19     | 5.76  |
|                          | M0     | 309    | 93.64 |
|                          | M1     | 2      | 0.61  |
|                          | Null   | 3      | 0.91  |

## Metabolic signatures of OSCC

|               |             |     |       |
|---------------|-------------|-----|-------|
| Tumor Stage   | I           | 12  | 3.64  |
|               | II          | 79  | 23.94 |
|               | III         | 67  | 20.30 |
|               | IV          | 162 | 49.09 |
|               | Null        | 10  | 3.03  |
| HPV           | +           | 10  | 3.03  |
|               | -           | 58  | 17.58 |
|               | Null        | 262 | 79.39 |
| Origin tissue | Tongue      | 144 | 43.64 |
|               | Mouth Floor | 72  | 21.82 |
|               | Cheek       | 19  | 5.76  |
|               | Pharynx     | 11  | 3.33  |
|               | Gum         | 10  | 3.03  |
|               | Plate       | 5   | 1.52  |
|               | others      | 69  | 20.91 |

**Table S2.** EMT, stemness, checkpoint signatures

| signature  | genes                                                                                                                                                                                                                                                                                                                                                                                                                                                                                                                                                                                                                                                                                                                                                                                            |
|------------|--------------------------------------------------------------------------------------------------------------------------------------------------------------------------------------------------------------------------------------------------------------------------------------------------------------------------------------------------------------------------------------------------------------------------------------------------------------------------------------------------------------------------------------------------------------------------------------------------------------------------------------------------------------------------------------------------------------------------------------------------------------------------------------------------|
| EMT        | ANLN, APLP2, CD63, CDH2, CLIC4, VCAN, CTSB, CX3CR1, DSG2, EDNRB, EMP1, ENC1, FGG, FZD1, TUBA4A, HMMR, ITGAV, LUM, L1CAM, MFAP1, MMP2, PFN1, PRKCA, RAB1A, RAN, RRAGA, SDCBP, SELENOP, SERPINA3, SMARCA1, SPA17, SPARC, TUBA4A, TUBA3C, TUBA1A, TUBB3                                                                                                                                                                                                                                                                                                                                                                                                                                                                                                                                             |
| stemness   | DNMT3B, PFAS, XRCC5, HAUS6, TET1, IGF2BP1, PLAA, TEX10, MSH6, DLGAP5, SKIV2L2, SOHLH2, RRAS2, PAICS, CPSF3, LIN28B, IPO5, BMPR1A, ZNF788, ASCC3, FANCB, HMGA2, TRIM24, ORC1, HDAC2, HESX1, INHBE, MIS18A, DCUN1D5, MRPL3, CENPH, MYCN, HAUS1, GDF3, TBCE, RIOK2, BCKDHB, RAD1, NREP, ADH5, PLRG1, ROR1, RAB3B, DIAPH3, GNL2, FGF2, NMNAT2, KIF20A, CENPI, DDX1, XXYLT1, GPR176, BBS9, C14orf166, BOD1, CDC123, SNRPD3, FAM118B, DPH3, EIF2B3, RPF2, APLP1, DACT1, PDHB, C14orf119, DTD1, SAMM50, CCL26, MED20, UTP6, RARS2, ARMCX2, RARS, MTHFD2, DHX15, HTR7, MTHFD1L, ARMC9, XPOT, IARS, HDX, ACTRT3, ERCC2, TBC1D16, GARS, KIF7, UBE2K, SLC25A3, ICMT, UGGT2, ATP11C, SLC24A1, EIF2AK4, GPX8, ALX1, OSTC, TRPC4, HAS2, FZD2, TRNT1, MMADHC, SNX8, CDH6, HAT1, SEC11A, DIMT1, TM2D2, FST, GBE1 |
| checkpoint | IDO1, LAG3, CTLA4, TNFRSF9, ICOS, CD80, PDCD1LG2, TIGIT, CD70, TNFSF9, ICOSLG, KIR3DL1, CD86, PDCD1, LAIR1, TNFRSF8, TNFSF15, TNFRSF14, IDO2, CD276, CD40, TNFRSF4, TNFSF14, HHLA2, CD244, CD274, HAVCR2, CD27, BTLA, LGALS9, TMIGD2, CD28, CD48, TNFRSF25, CD40LG, ADORA2A, VTCN1, CD160, CD44, TNFSF18, TNFRSF18, BTNL2, C10orf54, CD200R1, TNFSF4, CD200, NRP1                                                                                                                                                                                                                                                                                                                                                                                                                                |

# Metabolic signatures of OSCC

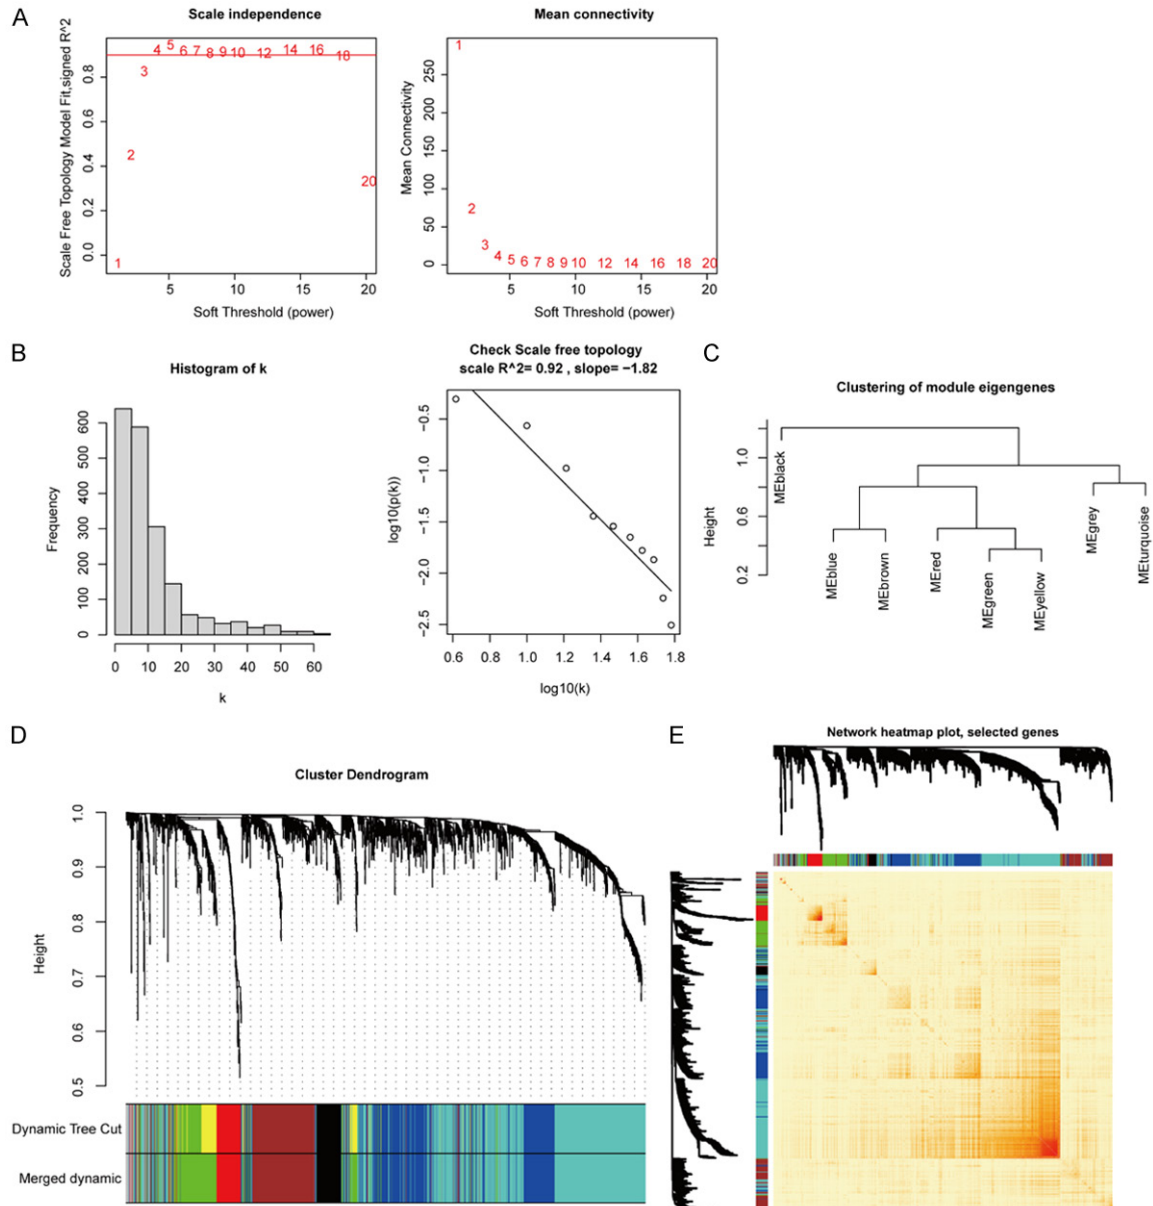

**Figure S2.** Construction of gene co-expression network. A. Analysis the scale-free fit index and mean connectivity of soft threshold of power. B. The distribution of  $k$  and liner model of fitting of  $R^2$  index. C. The dendrogram of gene modules. D. Gene dendrogram, the cut height was set as 0.4 to merge modules. E. Eigengene adjacency heatmap of 800 genes.

# Metabolic signatures of OSCC

green

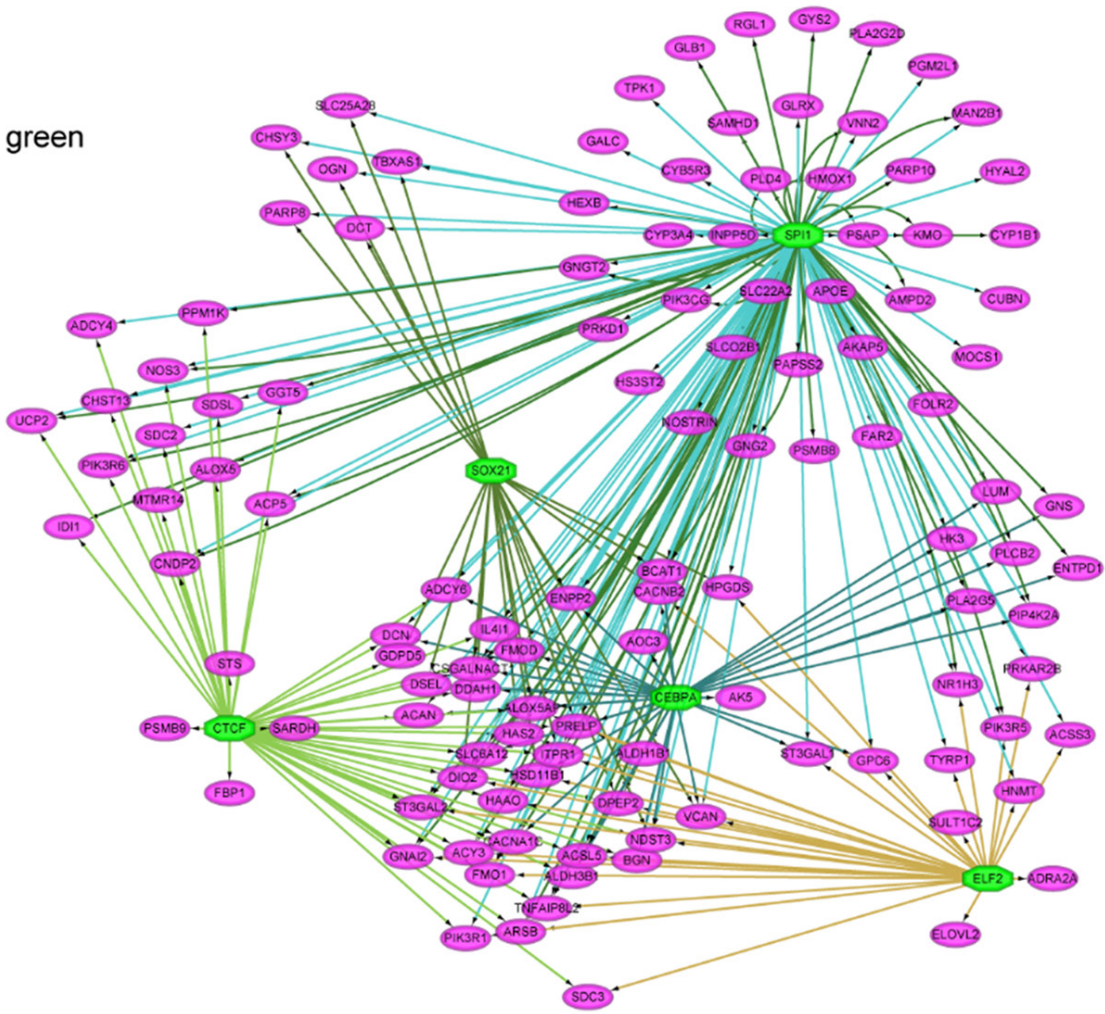

brown

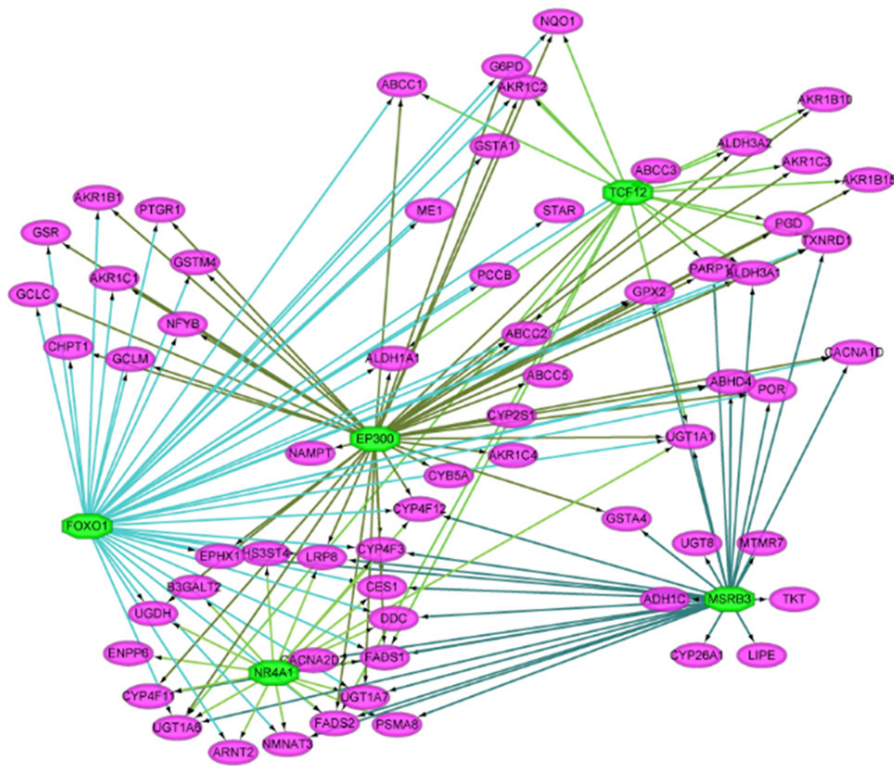

## Metabolic signatures of OSCC

**Figure S3.** Transcription factors of genes in green and brown modules predicted by iRegulon.

**Table S3.** The 12 genes signature and coefficient

| Gene       | Coef     |
|------------|----------|
| PTGR1      | 0.006695 |
| FUT7       | 0.006255 |
| ALDH1B1    | 0.307717 |
| FMOD       | -0.17457 |
| MCCC1      | 0.084753 |
| SLC2A3     | 0.276657 |
| UGT1A10    | 0.032856 |
| INPP5D     | -0.1686  |
| HK1        | 0.464965 |
| PRKCA      | 0.245153 |
| CSGALNACT1 | -0.53195 |
| NADSYN1    | 0.243603 |
| NADSYN1    | 0.243603 |

**Table S4.** KEGG metabolic pathways

| Pathways                                                             | statistic | p.value  |
|----------------------------------------------------------------------|-----------|----------|
| 1 2-Oxocarboxylic acid metabolism - Homo sapiens (human)             | 5.110798  | 5.47E-07 |
| 2 Alanine, aspartate and glutamate metabolism - Homo sapiens (human) | 4.916578  | 1.39E-06 |
| 3 alpha-Linolenic acid metabolism - Homo sapiens (human)             | -6.06745  | 3.59E-09 |
| 4 Amino sugar and nucleotide sugar metabolism - Homo sapiens (human) | 2.567315  | 0.010711 |
| 5 Arachidonic acid metabolism - Homo sapiens (human)                 | -5.05392  | 7.22E-07 |
| 6 Arginine and proline metabolism - Homo sapiens (human)             | 0.578506  | 0.563321 |
| 7 Arginine biosynthesis - Homo sapiens (human)                       | -0.23138  | 0.817162 |
| 8 Ascorbate and aldarate metabolism - Homo sapiens (human)           | 3.877937  | 0.000128 |
| 9 beta-Alanine metabolism - Homo sapiens (human)                     | -0.36899  | 0.712372 |
| 10 Biosynthesis of amino acids - Homo sapiens (human)                | 6.769541  | 5.97E-11 |
| 11 Biosynthesis of unsaturated fatty acids - Homo sapiens (human)    | -1.04469  | 0.296937 |
| 12 Biotin metabolism - Homo sapiens (human)                          | -1.83431  | 0.067514 |
| 13 Butanoate metabolism - Homo sapiens (human)                       | 0.351868  | 0.725168 |
| 14 Caffeine metabolism - Homo sapiens (human)                        | -1.66422  | 0.097038 |
| 15 Carbon metabolism - Homo sapiens (human)                          | 4.715426  | 3.62E-06 |
| 16 Citrate cycle (TCA cycle) - Homo sapiens (human)                  | 0.085758  | 0.931713 |
| 17 Cysteine and methionine metabolism - Homo sapiens (human)         | 2.376877  | 0.01804  |
| 18 D-Arginine and D-ornithine metabolism - Homo sapiens (human)      | -1.85745  | 0.064143 |
| 19 D-Glutamine and D-glutamate metabolism - Homo sapiens (human)     | 1.691564  | 0.091706 |
| 20 Drug metabolism - cytochrome P450 - Homo sapiens (human)          | 1.332127  | 0.183755 |
| 21 Drug metabolism - other enzymes - Homo sapiens (human)            | 3.482113  | 0.000565 |
| 22 Ether lipid metabolism - Homo sapiens (human)                     | -5.70615  | 2.59E-08 |
| 23 Fatty acid biosynthesis - Homo sapiens (human)                    | -2.89668  | 0.004025 |
| 24 Fatty acid degradation - Homo sapiens (human)                     | 0.338237  | 0.735408 |
| 25 Fatty acid elongation - Homo sapiens (human)                      | -2.79499  | 0.005496 |
| 26 Fatty acid metabolism - Homo sapiens (human)                      | -1.02522  | 0.306018 |
| 27 Folate biosynthesis - Homo sapiens (human)                        | -0.29924  | 0.764948 |
| 28 Fructose and mannose metabolism - Homo sapiens (human)            | 5.032899  | 8.03E-07 |

## Metabolic signatures of OSCC

|    |                                                                                              |          |          |
|----|----------------------------------------------------------------------------------------------|----------|----------|
| 29 | Galactose metabolism - Homo sapiens (human)                                                  | 2.088841 | 0.037496 |
| 30 | Glutathione metabolism - Homo sapiens (human)                                                | 3.517366 | 0.000498 |
| 31 | Glycerolipid metabolism - Homo sapiens (human)                                               | -1.42396 | 0.155408 |
| 32 | Glycerophospholipid metabolism - Homo sapiens (human)                                        | -1.26808 | 0.20567  |
| 33 | Glycine, serine and threonine metabolism - Homo sapiens (human)                              | 1.570814 | 0.117192 |
| 34 | Glycolysis/Gluconeogenesis - Homo sapiens (human)                                            | 3.694357 | 0.000258 |
| 35 | Glycosaminoglycan biosynthesis - chondroitin sulfate/dermatan sulfate - Homo sapiens (human) | 1.517116 | 0.130202 |
| 36 | Glycosaminoglycan biosynthesis - heparan sulfate/heparin - Homo sapiens (human)              | 1.350717 | 0.177728 |
| 37 | Glycosaminoglycan biosynthesis - keratan sulfate - Homo sapiens (human)                      | 1.484128 | 0.138735 |
| 38 | Glycosaminoglycan degradation - Homo sapiens (human)                                         | -0.71578 | 0.474636 |
| 39 | Glycosphingolipid biosynthesis - ganglio series - Homo sapiens (human)                       | 2.67079  | 0.007947 |
| 40 | Glycosphingolipid biosynthesis - globo and isoglobo series - Homo sapiens (human)            | -0.20665 | 0.836411 |
| 41 | Glycosphingolipid biosynthesis - lacto and neolacto series - Homo sapiens (human)            | -1.46715 | 0.143298 |
| 42 | Glycosylphosphatidylinositol (GPI)-anchor biosynthesis - Homo sapiens (human)                | 1.936882 | 0.053618 |
| 43 | Glyoxylate and dicarboxylate metabolism - Homo sapiens (human)                               | 2.579394 | 0.010345 |
| 44 | Histidine metabolism - Homo sapiens (human)                                                  | -3.73655 | 0.00022  |
| 45 | Inositol phosphate metabolism - Homo sapiens (human)                                         | -2.509   | 0.012593 |
| 46 | Linoleic acid metabolism - Homo sapiens (human)                                              | -5.93368 | 7.59E-09 |
| 47 | Lipoic acid metabolism - Homo sapiens (human)                                                | 1.082252 | 0.279937 |
| 48 | Lysine degradation - Homo sapiens (human)                                                    | 1.825642 | 0.068813 |
| 49 | Mannose type O-glycan biosynthesis - Homo sapiens (human)                                    | 4.115939 | 4.90E-05 |
| 50 | Metabolic pathways - Homo sapiens (human)                                                    | 0.329685 | 0.741849 |
| 51 | Metabolism of xenobiotics by cytochrome P450 - Homo sapiens (human)                          | 2.643925 | 0.008599 |
| 52 | Mucin type O-glycan biosynthesis - Homo sapiens (human)                                      | -0.23394 | 0.81518  |
| 53 | N-Glycan biosynthesis - Homo sapiens (human)                                                 | 0.638976 | 0.523286 |
| 54 | Neomycin, kanamycin and gentamicin biosynthesis - Homo sapiens (human)                       | 4.040443 | 6.67E-05 |
| 55 | Nicotinate and nicotinamide metabolism - Homo sapiens (human)                                | 0.820551 | 0.412499 |
| 56 | Nitrogen metabolism - Homo sapiens (human)                                                   | 0.442635 | 0.658322 |
| 57 | One carbon pool by folate - Homo sapiens (human)                                             | 2.410379 | 0.016486 |
| 58 | Other glycan degradation - Homo sapiens (human)                                              | 0.884766 | 0.376937 |
| 59 | Other types of O-glycan biosynthesis - Homo sapiens (human)                                  | 3.175186 | 0.00164  |
| 60 | Oxidative phosphorylation - Homo sapiens (human)                                             | 0.190115 | 0.849337 |
| 61 | Pantothenate and CoA biosynthesis - Homo sapiens (human)                                     | -5.84823 | 1.23E-08 |
| 62 | Pentose and glucuronate interconversions - Homo sapiens (human)                              | 2.829573 | 0.004956 |
| 63 | Pentose phosphate pathway - Homo sapiens (human)                                             | 4.044598 | 6.56E-05 |
| 64 | Phenylalanine metabolism - Homo sapiens (human)                                              | -0.29081 | 0.771388 |
| 65 | Phenylalanine, tyrosine and tryptophan biosynthesis - Homo sapiens (human)                   | 0.122598 | 0.902501 |
| 66 | Phosphonate and phosphinate metabolism - Homo sapiens (human)                                | 3.727206 | 0.000228 |
| 67 | Porphyrin and chlorophyll metabolism - Homo sapiens (human)                                  | 3.366537 | 0.000854 |
| 68 | Primary bile acid biosynthesis - Homo sapiens (human)                                        | -3.37802 | 0.000818 |
| 69 | Propanoate metabolism - Homo sapiens (human)                                                 | 1.604057 | 0.1097   |
| 70 | Purine metabolism - Homo sapiens (human)                                                     | 0.847311 | 0.39745  |
| 71 | Pyrimidine metabolism - Homo sapiens (human)                                                 | -1.04799 | 0.29542  |
| 72 | Pyruvate metabolism - Homo sapiens (human)                                                   | 2.582007 | 0.010257 |
| 73 | Retinol metabolism - Homo sapiens (human)                                                    | -0.59925 | 0.549423 |
| 74 | Riboflavin metabolism - Homo sapiens (human)                                                 | -0.95403 | 0.340774 |
| 75 | Selenocompound metabolism - Homo sapiens (human)                                             | 3.339217 | 0.000938 |
| 76 | Sphingolipid metabolism - Homo sapiens (human)                                               | -3.30776 | 0.00105  |

## Metabolic signatures of OSCC

|    |                                                                            |          |          |
|----|----------------------------------------------------------------------------|----------|----------|
| 77 | Starch and sucrose metabolism - Homo sapiens (human)                       | 0.724978 | 0.468983 |
| 78 | Steroid biosynthesis - Homo sapiens (human)                                | 0.555455 | 0.578964 |
| 79 | Steroid hormone biosynthesis - Homo sapiens (human)                        | 1.646613 | 0.100607 |
| 80 | Sulfur metabolism - Homo sapiens (human)                                   | -1.58328 | 0.114323 |
| 81 | Synthesis and degradation of ketone bodies - Homo sapiens (human)          | -0.49565 | 0.620471 |
| 82 | Taurine and hypotaurine metabolism - Homo sapiens (human)                  | -1.06229 | 0.288888 |
| 83 | Terpenoid backbone biosynthesis - Homo sapiens (human)                     | -1.99851 | 0.046487 |
| 84 | Thiamine metabolism - Homo sapiens (human)                                 | 0.457475 | 0.647634 |
| 85 | Tryptophan metabolism - Homo sapiens (human)                               | -1.53283 | 0.126328 |
| 86 | Tyrosine metabolism - Homo sapiens (human)                                 | 0.226162 | 0.82122  |
| 87 | Ubiquinone and other terpenoid-quinone biosynthesis - Homo sapiens (human) | 2.923608 | 0.003705 |
| 88 | Valine, leucine and isoleucine biosynthesis - Homo sapiens (human)         | 3.22197  | 0.001401 |
| 89 | Valine, leucine and isoleucine degradation - Homo sapiens (human)          | 2.326173 | 0.020629 |
| 90 | Vitamin B6 metabolism - Homo sapiens (human)                               | 0.122998 | 0.902184 |

**Table S5.** Immune related process and ICB-response signatures

| signature              | genes                                                                                                                                                                                                                                                                                                                                                                                                                                                                                                                                                                                                                                                                                                                                                                                                                                                                                                                                                                                                                                                                                                                                                                                                                                                                                                                                                                                                                                                                                                                                                                                                                                                                                                                                                                                                                                                                                                                                                                                                                     |
|------------------------|---------------------------------------------------------------------------------------------------------------------------------------------------------------------------------------------------------------------------------------------------------------------------------------------------------------------------------------------------------------------------------------------------------------------------------------------------------------------------------------------------------------------------------------------------------------------------------------------------------------------------------------------------------------------------------------------------------------------------------------------------------------------------------------------------------------------------------------------------------------------------------------------------------------------------------------------------------------------------------------------------------------------------------------------------------------------------------------------------------------------------------------------------------------------------------------------------------------------------------------------------------------------------------------------------------------------------------------------------------------------------------------------------------------------------------------------------------------------------------------------------------------------------------------------------------------------------------------------------------------------------------------------------------------------------------------------------------------------------------------------------------------------------------------------------------------------------------------------------------------------------------------------------------------------------------------------------------------------------------------------------------------------------|
| APC co inhibition      | C10orf54, CD274, LGALS9, PDCD1LG2, PVRL3, CD40, CD58, CD70, ICOSLG, SLAMF1, TNFSF14, TNFSF15, TNFSF18, TNFSF4, TNFSF8, TNFSF9                                                                                                                                                                                                                                                                                                                                                                                                                                                                                                                                                                                                                                                                                                                                                                                                                                                                                                                                                                                                                                                                                                                                                                                                                                                                                                                                                                                                                                                                                                                                                                                                                                                                                                                                                                                                                                                                                             |
| CCR                    | CCL16, TPO, TGFB2, CXCL2, CCL14, TGFB3, IL11RA, CCL11, IL411, IL33, CXCL12, CXCL10, BMPER, BMP8A, CXCL11, IL21R, IL17B, TNFRSF9, ILF2, CX3CR1, CCR8, TNFSF12, CSF3, TNFSF4, BMP3, CX3CL1, BMP5, CXCR2, TNFRSF10D, BMP2, CXCL14, CCL28, CXCL3, BMP6, CCL21, CXCL9, CCL23, IL6, TNFRSF18, IL17RD, IL17D, IL27, CCL7, IL1R1, CXCR4, CXCR2P1, TGFB1I1, IFNGR1, IL9R, IL1RAPL1, IL11, CSF1, IL20RA, IL25, TNFRSF4, IL18, ILF3, CCL20, TNFRSF12A, IL6ST, CXCL13, IL12B, TNFRSF8, IL6R, BMP2, IFNE, IL1RAPL2, IL3RA, BMP4, CCL24, TNFSF13B, CCR4, IL2RA, IL32, TNFRSF10C, IL22RA1, BMPR1A, CXCR5, CXCR3, IFNA8, IL17REL, IFNB1, IFNAR1, TNFRSF1B, CCL17, IFNL1, IL16, IL1RL1, ILK, CCL25, ILDR2, CXCR1, IL36RN, IL34, TGFB1, IFNG, IL19, ILKAP, BMP2K, CCR10, ILDR1, EPO, CCR7, IL17C, IL23A, CCR5, IL7, EPOR, CCL13, IL2RG, IL31RA, TNFAIP6, IFNL2, BMP1, IL12RB1, TNFAIP8, IL4R, TNFRSF6B, TNFAIP8L1, TNFRSF10B, IFNL3, CCL5, CXCL6, CXCL1, CCR3, TNFSF11, CSF1R, IL21, IL1RAP, IL12RB2, CCL1, IL17RA, CCR1, IL1RN, TNFRSF11B, TNFRSF14, IL13, IL2RB, BMP8B, CCL2, IL24, IL18RAP, TGFB1, TNFSF10, TNFRSF11A, CXCL5, IL5RA, TNFSF9, IL1RL2, TNFRSF13C, IL36G, IL15RA, TNFRSF21, CXCL8, IL22RA2, TNFAIP8L2, IL18R1, IFNLR1, CXCR6, CCL3L3, TNFRSF1A, IL17RE, IFNGR2, IL17RC, TNFAIP8L3, ILVBL, TGFB1P1, CCL4L1, CSF2RA, CCRN4L, CCL26, TNFAIP1, CCRL2, IFNA10, TNFRSF17, IFNA13, IL20, IL18BP, CCL3L1, TNFSF12-TNFSF13, IL5, IL23R, IL26, TNF, TGFA, CSF2, IL1F10, CXCL17, TNFSF13, IFNA4, IL37, IL12A, IL7R, IFNA1, IL1A, IL4, IL2, CCL22, CSF3R, IL10, IFNK, TGFB2, IL1R2, IL1B, IL17F, IL27RA, IL15, TNFSF8, IL36B, XCL1, CXCL16, TNFRSF19, IL3, CCL3, IFNA2, BMPR1B, IFNA21, TNFSF18, CCL8, IL17RB, TNFRSF25, IL22, IL10RB, IFNAR2, CCL18, IFNA16, CSF2RB, IL36A, TNFAIP3, IL13RA2, IL13RA1, CCR9, TNFRSF10A, IFNA7, IFNW1, XCL2, TNFSF14, CCR2, BMP15, BMP10, CCL15-CCL14, TGFB1, IFNA5, BMP7, IFNA14, IL20RB, IL10RA, IFNA17, CCR6, TGFB3, CCL15, CCL4, CCL27, TNFRSF13B, TNFAIP2, IL31, IL17A, TNFSF15, CCL19, IFNA6, IL9 |
| checkpoint             | IDO1, LAG3, CTLA4, TNFRSF9, ICOS, CD80, PDCD1LG2, TIGIT, CD70, TNFSF9, ICOSLG, KIR3DL1, CD86, PDCD1, LAIR1, TNFRSF8, TNFSF15, TNFRSF14, IDO2, CD276, CD40, TNFRSF4, TNFSF14, HHLA2, CD244, CD274, HAVCR2, CD27, BTLA, LGALS9, TMIGD2, CD28, CD48, TNFRSF25, CD40LG, ADORA2A, VTCN1, CD160, CD44, TNFSF18, TNFRSF18, BTNL2, C10orf54, CD200R1, TNFSF4, CD200, NRP1                                                                                                                                                                                                                                                                                                                                                                                                                                                                                                                                                                                                                                                                                                                                                                                                                                                                                                                                                                                                                                                                                                                                                                                                                                                                                                                                                                                                                                                                                                                                                                                                                                                         |
| Cytolytic activity     | PRF1, GZMB, GZMA                                                                                                                                                                                                                                                                                                                                                                                                                                                                                                                                                                                                                                                                                                                                                                                                                                                                                                                                                                                                                                                                                                                                                                                                                                                                                                                                                                                                                                                                                                                                                                                                                                                                                                                                                                                                                                                                                                                                                                                                          |
| HLA                    | HLA-E, HLA-DPB2, HLA-C, HLA-J, HLA-DQB1, HLA-DQB2, HLA-DQA2, HLA-DQA1, HLA-A, HLA-DMA, HLA-DOB, HLA-DRB1, HLA-H, HLA-B, HLA-DRB5, HLA-DOA, HLA-DPB1, HLA-DRA, HLA-DRB6, HLA-L, HLA-F, HLA-G, HLA-DMB, HLA-DPA1                                                                                                                                                                                                                                                                                                                                                                                                                                                                                                                                                                                                                                                                                                                                                                                                                                                                                                                                                                                                                                                                                                                                                                                                                                                                                                                                                                                                                                                                                                                                                                                                                                                                                                                                                                                                            |
| Inflammation-promoting | CCL5, CD19, CD8B, CXCL10, CXCL13, CXCL9, GNLY, GZMB, IFNG, IL12A, IL12B, IRF1, PRF1, STAT1, TBX21                                                                                                                                                                                                                                                                                                                                                                                                                                                                                                                                                                                                                                                                                                                                                                                                                                                                                                                                                                                                                                                                                                                                                                                                                                                                                                                                                                                                                                                                                                                                                                                                                                                                                                                                                                                                                                                                                                                         |
| Parainflammation       | CXCL10, PLAT, CCND1, LGMN, PLAUR, AIM2, MMP7, ICAM1, MX2, CXCL9, ANXA1, TLR2, PLA2G2D, ITGA2, MX1, HMOX1, CD276, TIRAP, IL33, PTGES, TNFRSF12A, SCARB1, CD14, BLNK, IFIT3, RETNLB, IFIT2, ISG15, OAS2, REL, OAS3, CD44, PPARG, BST2, OAS1, NOX1, PLA2G2A, IFIT1, IFITM3, IL1RN                                                                                                                                                                                                                                                                                                                                                                                                                                                                                                                                                                                                                                                                                                                                                                                                                                                                                                                                                                                                                                                                                                                                                                                                                                                                                                                                                                                                                                                                                                                                                                                                                                                                                                                                            |

## Metabolic signatures of OSCC

|                              |                                                                                                                                                                                                                                                                                                                                                                                                                                                                                                                                                                                                                                                                                                                                                                                                                                                                                                        |
|------------------------------|--------------------------------------------------------------------------------------------------------------------------------------------------------------------------------------------------------------------------------------------------------------------------------------------------------------------------------------------------------------------------------------------------------------------------------------------------------------------------------------------------------------------------------------------------------------------------------------------------------------------------------------------------------------------------------------------------------------------------------------------------------------------------------------------------------------------------------------------------------------------------------------------------------|
| T cell co-inhibition         | BTLA, C10orf54, CD160, CD244, CD274, CTLA4, HAVCR2, LAG3, LAIR1, TIGIT                                                                                                                                                                                                                                                                                                                                                                                                                                                                                                                                                                                                                                                                                                                                                                                                                                 |
| T cell co-stimulation        | CD2, CD226, CD27, CD28, CD40LG, ICOS, SLAMF1, TNFRSF18, TNFRSF25, TNFRSF4, TNFRSF8, TNFRSF9, TNFSF14                                                                                                                                                                                                                                                                                                                                                                                                                                                                                                                                                                                                                                                                                                                                                                                                   |
| Type I IFN Reponse           | DDX4, IFIT1, IFIT2, IFIT3, IRF7, ISG20, MX1, MX2, RSAD2, TNFSF10                                                                                                                                                                                                                                                                                                                                                                                                                                                                                                                                                                                                                                                                                                                                                                                                                                       |
| Type II IFN Reponse          | GPR146, SELP, AHR                                                                                                                                                                                                                                                                                                                                                                                                                                                                                                                                                                                                                                                                                                                                                                                                                                                                                      |
| ICB-response                 | AKR1C4, KCNA1, CREB3L3, NEU4, PIGR, ACOD1, CPN2, CCL16, HGD, DEFA1, TAT, PDCD1, GLYATL1, MT1H, COLEC10, THRSF, HS3ST3B1, IL24, IFNG, SMC02, TMEM155, DBH                                                                                                                                                                                                                                                                                                                                                                                                                                                                                                                                                                                                                                                                                                                                               |
| CD8 T effector               | CD8A, CXCL10, CXCL9, GZMA, GZMB, IFNG, PRF1, TBX21                                                                                                                                                                                                                                                                                                                                                                                                                                                                                                                                                                                                                                                                                                                                                                                                                                                     |
| DNA damage repair            | ALKBH2, ALKBH3, APEX1, APEX2, APLF, ATM, ATR, ATRIP, BLM, BRCA1, BRCA2, BRIP1, CCNH, CDK7, CETN2, CHAF1A, CHEK1, CHEK2, CLK2, DCLRE1C, DDB1, DDB2, DUT, ENDOV, ERCC1, ERCC2, ERCC3, ERCC4, ERCC5, ERCC6, ERCC8, FAN1, FANCA, FANCB, FANCC, FANCD2, FANCE, FANCF, FANCG, FANCL, FANCM, GTF2H1, GTF2H2, GTF2H3, GTF2H4, GTF2H5, H2AFX, HLTf, HUS1, LIG1, LIG3, LIG4, MBD4, MDC1, MGMT, MLH1, MLH3, MMS19, MNAT1, MPG, MSH2, MSH3, MSH4, MSH5, MSH6, MUTYH, NEIL1, NEIL2, NEIL3, NHEJ1, NTHL1, NUDT1, OGG1, PALB2, PARP1, PARP2, PARP3, PCNA, PER1, PMS1, PMS2, PNKP, POLB, POLD1, POLE, POLG, POLH, POLL, POLM, POLQ, PRKDC, RAD1, RAD17, RAD18, RAD23A, RAD23B, RAD51C, RAD9A, RECQL4, RECQL5, RIF1, RNF168, RNF4, RNF8, RPA1, RPA2, RPA3, RPA4, RRM2B, SETMAR, SHPRH, SMUG1, TDP1, TDP2, TOPBP1, TP53, TREX1, UBE2A, UBE2B, UBE2N, UBE2V2, UNG, UVSSA, WRN, XAB2, XPA, XPC, XRCC1, XRCC4, XRCC5, XRCC6 |
| Pan-F-TBRS                   | ACTA2, ACTG2, ADAM12, ADAM19, CNN1, COL4A1, CTGF, CTPS1, FAM101B, FSTL3, HSPB1, IGFBP3, PXDC1, SEMA7A, SH3PXD2A, TAGLN, TGFB1, TNS1, TPM1                                                                                                                                                                                                                                                                                                                                                                                                                                                                                                                                                                                                                                                                                                                                                              |
| Antigen processing machinery | B2M, HLA-A, HLA-B, HLA-C, TAP1, TAP2                                                                                                                                                                                                                                                                                                                                                                                                                                                                                                                                                                                                                                                                                                                                                                                                                                                                   |
| Immune checkpoint            | CD274, CTLA4, HAVCR2, LAG3, PDCD1, PDCD1LG2, TIGIT                                                                                                                                                                                                                                                                                                                                                                                                                                                                                                                                                                                                                                                                                                                                                                                                                                                     |
| EMT (1)                      | CLDN3, CLDN7, CLDN4, CDH1, VIM, TWIST1, ZEB1, ZEB2                                                                                                                                                                                                                                                                                                                                                                                                                                                                                                                                                                                                                                                                                                                                                                                                                                                     |
| FGFR3-related genes          | FGFR3, TP63, WNT7B                                                                                                                                                                                                                                                                                                                                                                                                                                                                                                                                                                                                                                                                                                                                                                                                                                                                                     |
| KEGG discovered histones     | HIST1H2AG, HIST1H2AI, HIST1H2BL, HIST2H2BF                                                                                                                                                                                                                                                                                                                                                                                                                                                                                                                                                                                                                                                                                                                                                                                                                                                             |
| Angiogenesis                 | CDH5, SOX17, SOX18, TEK                                                                                                                                                                                                                                                                                                                                                                                                                                                                                                                                                                                                                                                                                                                                                                                                                                                                                |
| Fanconi anemia               | APITD1, ATR, ATRIP, BLM, BRCA1, BRCA2, BRIP1, C17orf70, C19orf40, EME1, EME2, ERCC1, ERCC4, FAN1, FANCA, FANCB, FANCC, FANCD2, FANCE, FANCF, FANCG, FANCI, FANCL, FANCM, HES1, MLH1, MUS81, PALB2, PMS2, POLH, POLI, POLK, POLN, RAD51, RAD51C, REV1, REV3L, RMI1, RMI2, RPA1, RPA2, RPA3, RPA4, SLX4, STRA13, TELO2, TOP3A, TOP3B, UBE2T, USP1, WDR48                                                                                                                                                                                                                                                                                                                                                                                                                                                                                                                                                 |
| Cell cycle                   | ABL1, ANAPC1, ANAPC10, ANAPC11, ANAPC13, ANAPC2, ANAPC4, ANAPC5, ANAPC7, ATM, ATR, BUB1, BUB1B, BUB3, CCNA1, CCNA2, CCNB1, CCNB2, CCNB3, CCND1, CCND2, CCND3, CCNE1, CCNE2, CCNH, CDC14A, CDC14B, CDC16, CDC20, CDC23, CDC25A, CDC25B, CDC25C, CDC26, CDC27, CDC45, CDC6, CDC7, CDK1, CDK2, CDK4, CDK6, CDK7, CDKN1A, CDKN1B, CDKN1C, CDKN2A, CDKN2B, CDKN2C, CDKN2D, CHEK1, CHEK2, CREBBP, CUL1, DBF4, E2F1, E2F2, E2F3, E2F4, E2F5, EP300, ESPL1, FZR1, GADD45A, GADD45B, GADD45G, GSK3B, HDAC1, HDAC2, MAD1L1, MAD2L1, MAD2L2, MCM2, MCM3, MCM4, MCM5, MCM6, MCM7, MDM2, MYC, ORC1, ORC2, ORC3, ORC4, ORC5, ORC6, PCNA, PKMYT1, PLK1, PRKDC, PTTG1, PTTG2, RAD21, RB1, RBL1, RBL2, RBX1, SFN, SKP1, SKP2, SMAD2, SMAD3, SMAD4, SMC1A, SMC1B, SMC3, STAG1, STAG2, TFDP1, TFDP2, TGFB1, TGFB2, TGFB3, TP53, TTK, WEE1, YWHAB, YWHAE, YWHAG, YWHAH, YWHAQ, YWHAZ, ZBTB17                               |
| DNA replication              | DNA2, FEN1, LIG1, MCM2, MCM3, MCM4, MCM5, MCM6, MCM7, PCNA, POLA1, POLA2, POLD1, POLD2, POLD3, POLD4, POLE, POLE2, POLE3, POLE4, PRIM1, PRIM2, RFC1, RFC2, RFC3, RFC4, RFC5, RNASEH1, RNASEH2A, RNASEH2B, RNASEH2C, RPA1, RPA2, RPA3, RPA4, SSBP1                                                                                                                                                                                                                                                                                                                                                                                                                                                                                                                                                                                                                                                      |
| Nucleotide excision repair   | CCNH, CDK7, CETN2, CUL4A, CUL4B, DDB1, DDB2, ERCC1, ERCC2, ERCC3, ERCC4, ERCC5, ERCC6, ERCC8, GTF2H1, GTF2H2, GTF2H3, GTF2H4, GTF2H5, LIG1, MNAT1, PCNA, POLD1, POLD2, POLD3, POLD4, POLE, POLE2, POLE3, POLE4, RAD23A, RAD23B, RBX1, RFC1, RFC2, RFC3, RFC4, RFC5, RPA1, RPA2, RPA3, RPA4, XPA, XPC                                                                                                                                                                                                                                                                                                                                                                                                                                                                                                                                                                                                   |
| Homologous recombination     | BLM, BRCA2, EME1, MRE11A, MUS81, NBN, POLD1, POLD2, POLD3, POLD4, RAD50, RAD51, RAD51B, RAD51C, RAD51D, RAD52, RAD54B, RAD54L, RPA1, RPA2, RPA3, RPA4, SHFM1, SSBP1, TOP3A, TOP3B, XRCC2, XRCC3                                                                                                                                                                                                                                                                                                                                                                                                                                                                                                                                                                                                                                                                                                        |
| Mismatch repair              | EXO1, LIG1, MLH1, MLH3, MSH2, MSH3, MSH6, PCNA, PMS2, POLD1, POLD2, POLD3, POLD4, RFC1, RFC2, RFC3, RFC4, RFC5, RPA1, RPA2, RPA3, RPA4, SSBP1                                                                                                                                                                                                                                                                                                                                                                                                                                                                                                                                                                                                                                                                                                                                                          |
| EMT2                         | AXL, FAP, LOXL2, ROR2, TAGLN, TWIST2, WNT5A                                                                                                                                                                                                                                                                                                                                                                                                                                                                                                                                                                                                                                                                                                                                                                                                                                                            |
| EMT3                         | FOXF1, GATA6, SOX9, TWIST1, ZEB1, ZEB2                                                                                                                                                                                                                                                                                                                                                                                                                                                                                                                                                                                                                                                                                                                                                                                                                                                                 |
| WNT target                   | EFNB3, MYC, TCF12, VEGFA                                                                                                                                                                                                                                                                                                                                                                                                                                                                                                                                                                                                                                                                                                                                                                                                                                                                               |
| Cell cycle regulators        | ATM, CCND1, CCNE1, CDKN1A, CDKN2A, E2F3, FBXW7, MDM2, RB1, TP53                                                                                                                                                                                                                                                                                                                                                                                                                                                                                                                                                                                                                                                                                                                                                                                                                                        |



# Metabolic signatures of OSCC

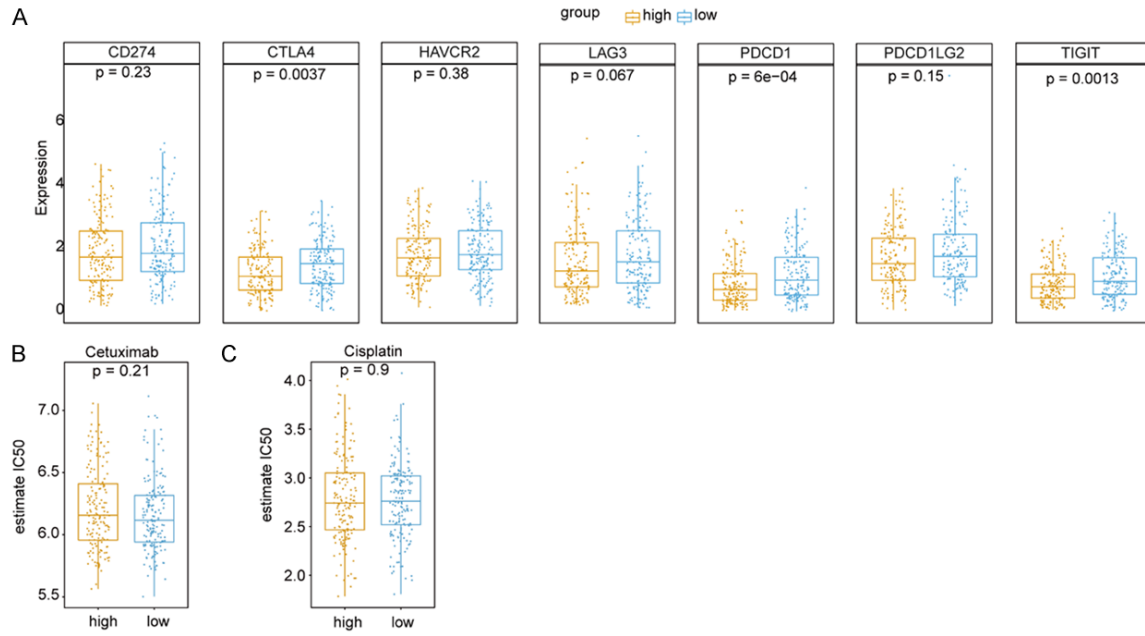

**Figure S4.** Checkpoints and IC50 of drugs. A. The 7 checkpoints expression in different risk group. B, C. IC50 of Cetuximab and Cisplatin estimated by “pRRophetic” package.

# Metabolic signatures of OSCC

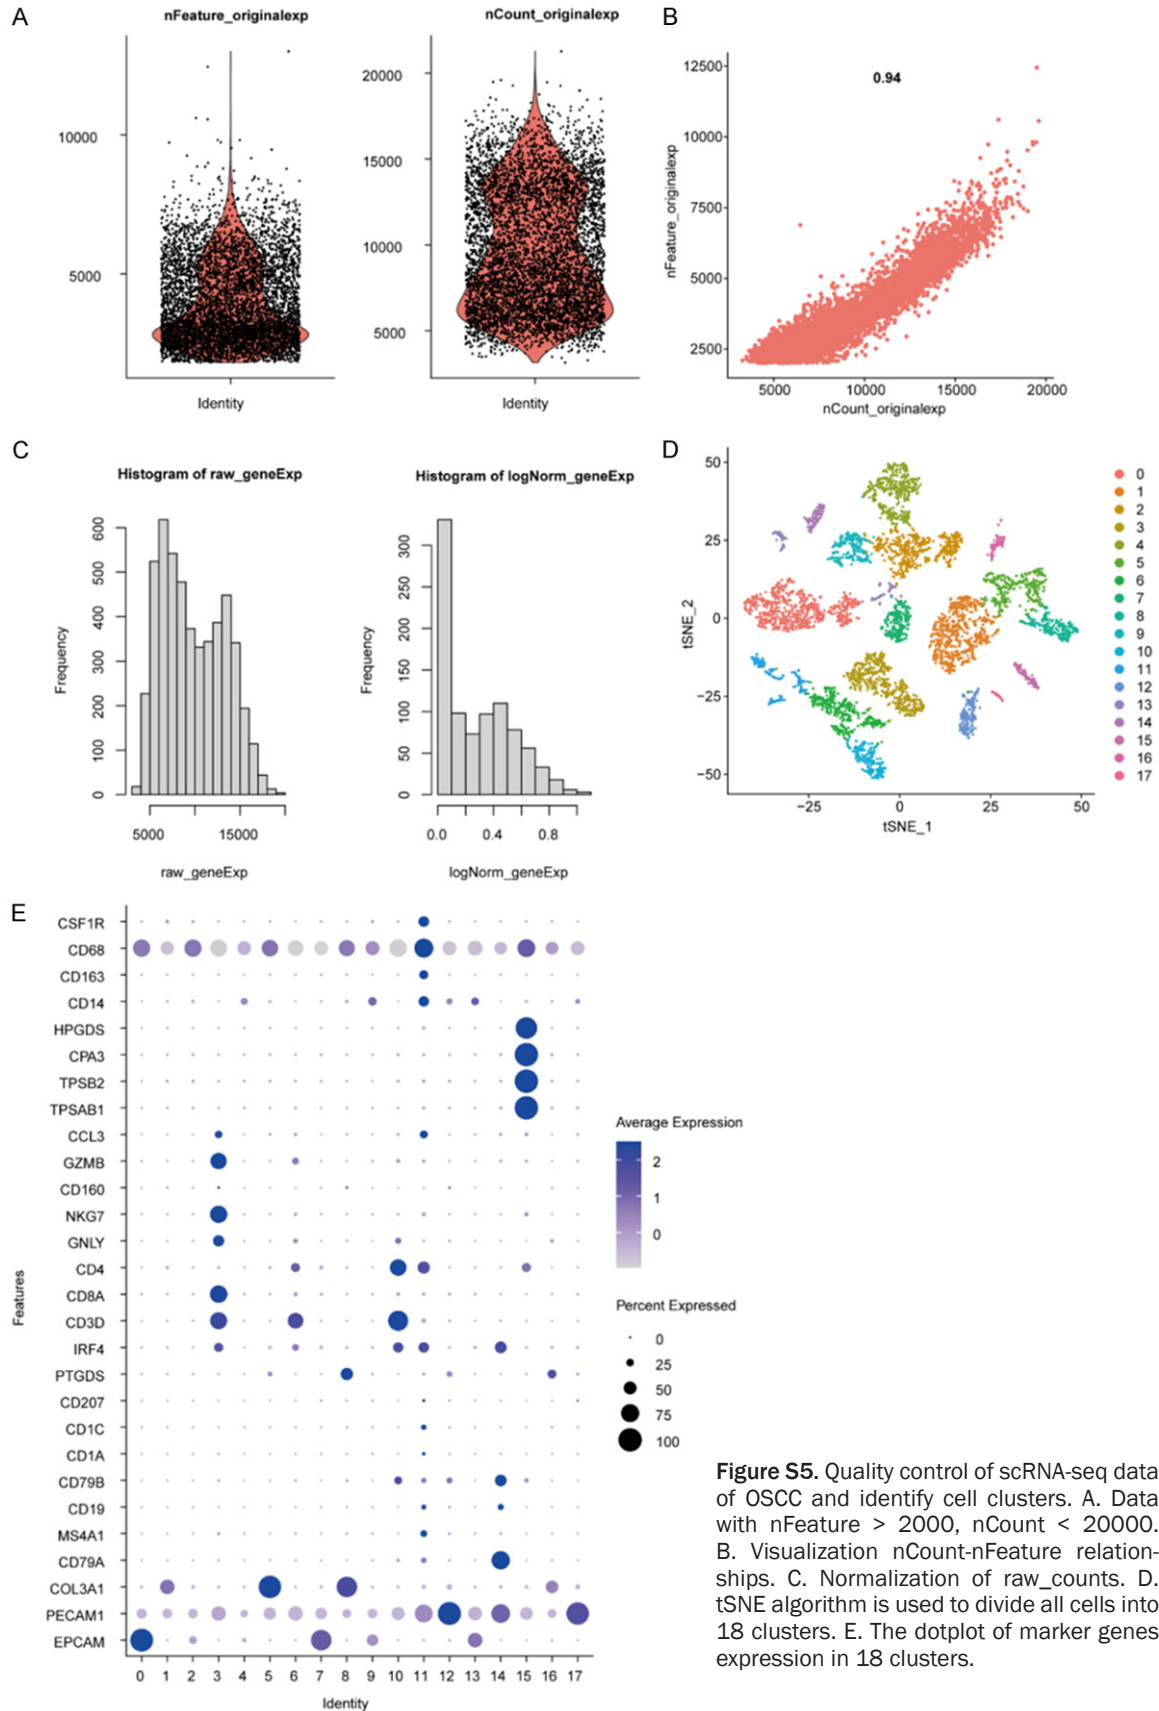

**Figure S5.** Quality control of scRNA-seq data of OSCC and identify cell clusters. A. Data with nFeature > 2000, nCount < 20000. B. Visualization nCount-nFeature relationships. C. Normalization of raw\_counts. D. tSNE algorithm is used to divide all cells into 18 clusters. E. The dotplot of marker genes expression in 18 clusters.

# Metabolic signatures of OSCC

**Table S6.** Markers used to identify cell types in 18 cell clusters

| Cells             | Marker genes                    |
|-------------------|---------------------------------|
| Tumor cells       | EPCAM                           |
| Endothelial cells | PECAM1                          |
| Fibroblasts       | COL3A1                          |
| B cells           | CD79A, MS4A1, IGHM, CD19, CD79B |
| Dendritic cells   | CD1A, CD1C, CD207, PTGDS, IRF4  |
| T cell            | CD3D, CD8A, CD4                 |
| NK cells          | GNLY, NKG7, CD160, GZMB, CCL3   |
| Mast cells        | TPSAB1, TPSB2, CPA3, HPGDS      |
| Macrophages       | CD14, CD163, CD68, CSF1R        |

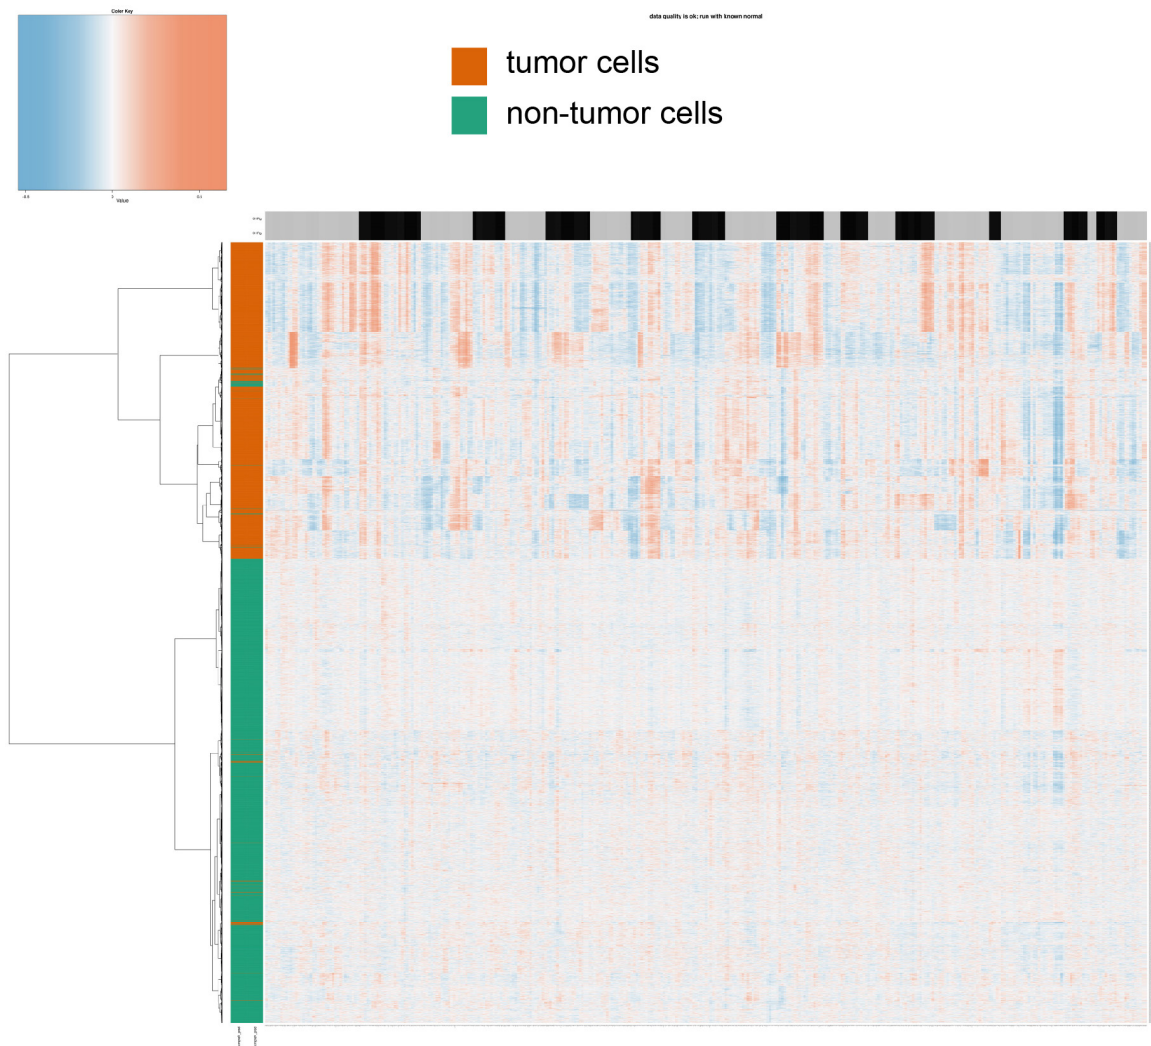

**Figure S6.** The estimated CNVs of 5746 cells analyzed by CopyKAT.

# Metabolic signatures of OSCC

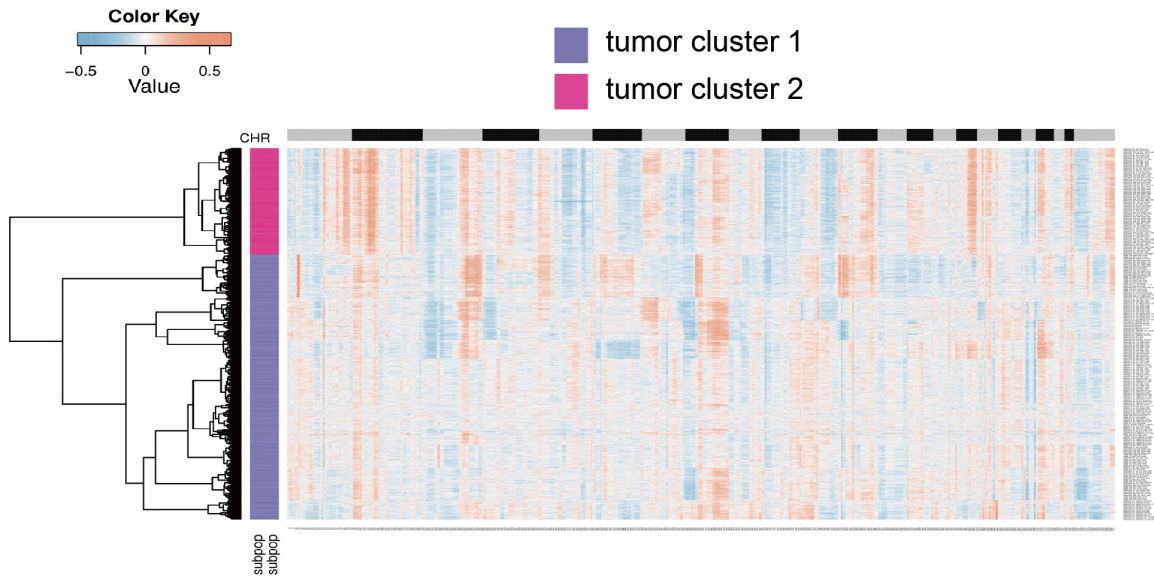

**Figure S7.** The estimated CNVs of tumor cells analyzed by CopyKAT.
